# Supplementary material for: Association Between Symptom Onset, Body Temperature, and SARS-CoV-2 RT-PCR Cycle Threshold Values: A Retrospective Analysis of 906 Outpatient COVID-19 Patients
Source: Research Square preprint supplement (doi:10.21203/rs.3.rs-7230191/v1), 2025-10-19
Supplement: Supplementary file 1 [file 9e6bbf8277281ce53e2c0114.docx]

**Supplementary File 1**

Title: Questionnaire for Outpatient COVID-19 Cases

Purpose: This questionnaire was developed to collect patient-reported symptoms and clinical background at the time of clinic visit.

Age: _____ years

Sex:

 ☐ Male   ☐ Female

Underlying medical conditions (select all that apply):

 ☐ Hypertension   ☐ Diabetes mellitus   ☐ Cardiovascular disease

 ☐ Chronic lung disease   ☐ Cancer   ☐ Immunosuppressed condition

 ☐ None   ☐ Other (please specify): ____________________

COVID-19 vaccination history:

 ☐ Unvaccinated  ☐ 1 dose  ☐ 2 doses  ☐ 3 doses  ☐ 4 doses  ☐ 5 doses  ☐ Unknown

Fever

Please describe the maximum body temperature (subjective or measured) and when the fever started.

(e.g., “38.5°C on July 2nd” or “Low-grade fever since the night before the clinic visit”)

Answer: ___________________________________________

Other symptoms

Please indicate whether you experienced any of the following symptoms, and if so, describe when each symptom began.

Symptom Onset date / Description

☐ Cough _________________________

☐ Sore throat _________________________

☐ Fatigue _________________________

☐ Headache _________________________

☐ Nasal discharge/congestion _________________________

☐ Gastrointestinal symptoms (e.g., diarrhea, nausea) _________________________

☐ Loss of taste or smell _________________________

☐ Other symptoms (please specify): ___________ _________________________

☐ None of the above —

History of previous COVID-19 infection:

 ☐ Yes   ☐ No   ☐ Unknown

 If yes, please provide the date of previous infection (onset date):

 Date: ___________________________

Close contact with confirmed COVID-19 case:

 ☐ Yes   ☐ No   ☐ Unknown
